# Supplementary material for: Mendelian randomization as an approach to assess causal effects of inflammatory bowel disease on atrial fibrillation
Source: publisher site journal article supplement (doi:10.18632/aging.202906), 2021-04-06
Supplement: Supplementary file [file aging-v13i8-202906-supplementary-material-SD1.pdf]

**SUPPLEMENTARY TABLES**

**Supplementary Table 1. Causal estimate with MR-egger and multiplicative random effects IVW (each SNP and overall effect).**

| <b>SNP</b> | <b>Beta</b> | <b>SE</b> | <b>p-value</b> |
|------------|-------------|-----------|----------------|
| rs1042058  | -0.0775     | 0.0958    | 0.4186         |
| rs10521318 | -0.0424     | 0.0896    | 0.6357         |
| rs1062158  | -0.1723     | 0.0843    | 0.0409         |
| rs10758669 | -0.0217     | 0.0471    | 0.6451         |
| rs10761659 | -0.0121     | 0.0428    | 0.7767         |
| rs11209026 | -0.0059     | 0.0196    | 0.7625         |
| rs11230563 | 0.0496      | 0.0846    | 0.5581         |
| rs11564126 | 0.0260      | 0.0743    | 0.7260         |
| rs11597483 | -0.1413     | 0.0622    | 0.0231         |
| rs11672983 | 0.0488      | 0.1005    | 0.6275         |
| rs11742570 | 0.0267      | 0.0371    | 0.4712         |
| rs11879191 | 0.0545      | 0.0693    | 0.4320         |
| rs12142199 | -0.0880     | 0.0880    | 0.3173         |
| rs1250550  | -0.1594     | 0.0724    | 0.0278         |
| rs12722515 | 0.1418      | 0.0964    | 0.1412         |
| rs1292053  | -0.2752     | 0.0960    | 0.0042         |
| rs12942547 | -0.0648     | 0.0630    | 0.3033         |
| rs13009506 | 0.0536      | 0.0484    | 0.2687         |
| rs13019081 | -0.0509     | 0.0707    | 0.4712         |
| rs1456896  | -0.0371     | 0.0798    | 0.6421         |
| rs1516976  | 0.0333      | 0.1019    | 0.7440         |
| rs1517352  | -0.0387     | 0.0907    | 0.6698         |
| rs1558744  | 0.0850      | 0.0615    | 0.1669         |
| rs1569723  | 0.1652      | 0.0949    | 0.0818         |
| rs17085007 | 0.1221      | 0.0830    | 0.1412         |
| rs17119    | -0.0225     | 0.0909    | 0.8049         |
| rs17396847 | -0.1128     | 0.0786    | 0.1513         |
| rs17694108 | -0.0933     | 0.0764    | 0.2222         |
| rs1847472  | 0.0227      | 0.0994    | 0.8192         |
| rs1872691  | 0.0477      | 0.0676    | 0.4803         |
| rs2024092  | -0.0009     | 0.0753    | 0.9903         |
| rs2155219  | 0.0850      | 0.0482    | 0.0782         |
| rs2413583  | -0.1309     | 0.0501    | 0.0089         |
| rs243323   | 0.1358      | 0.0770    | 0.0778         |
| rs259964   | 0.0469      | 0.0850    | 0.5808         |
| rs2816954  | -0.2728     | 0.0973    | 0.0051         |
| rs2823286  | -0.0355     | 0.0525    | 0.4992         |
| rs2836878  | 0.0813      | 0.0424    | 0.0549         |
| rs2930047  | -0.1093     | 0.1062    | 0.3035         |
| rs3091316  | 0.0150      | 0.0644    | 0.8159         |
| rs3764147  | 0.0173      | 0.0866    | 0.8415         |

|                                                 |         |        |        |
|-------------------------------------------------|---------|--------|--------|
| rs3851228                                       | -0.0252 | 0.0857 | 0.7687 |
| rs4246905                                       | 0.0890  | 0.0506 | 0.0784 |
| rs4380874                                       | -0.1229 | 0.0731 | 0.0927 |
| rs4409764                                       | -0.0169 | 0.0385 | 0.6604 |
| rs4626115                                       | -0.0532 | 0.0893 | 0.5513 |
| rs4656958                                       | 0.1620  | 0.1027 | 0.1147 |
| rs4743820                                       | 0.1519  | 0.1036 | 0.1427 |
| rs4921227                                       | -0.0224 | 0.0481 | 0.6421 |
| rs559928                                        | 0.1718  | 0.0886 | 0.0523 |
| rs6017342                                       | 0.0067  | 0.0585 | 0.9090 |
| rs6142618                                       | -0.0235 | 0.0997 | 0.8140 |
| rs6426833                                       | 0.1137  | 0.0540 | 0.0352 |
| rs6588248                                       | -0.0338 | 0.0798 | 0.6714 |
| rs6592362                                       | -0.0312 | 0.1093 | 0.7751 |
| rs6724516                                       | -0.0978 | 0.0978 | 0.3173 |
| rs6740462                                       | 0.0383  | 0.1079 | 0.7224 |
| rs683078                                        | -0.0091 | 0.1018 | 0.9286 |
| rs6879495                                       | 0.0796  | 0.0847 | 0.3475 |
| rs6911490                                       | -0.0343 | 0.0686 | 0.6171 |
| rs6920220                                       | 0.1063  | 0.0793 | 0.1798 |
| rs7097656                                       | -0.1681 | 0.0784 | 0.0320 |
| rs7200798                                       | 0.0651  | 0.1064 | 0.5406 |
| rs7214193                                       | 0.2440  | 0.1105 | 0.0273 |
| rs7240004                                       | -0.0165 | 0.1034 | 0.8733 |
| rs727088                                        | -0.0535 | 0.1025 | 0.6014 |
| rs7495132                                       | -0.0468 | 0.0886 | 0.5973 |
| rs7554511                                       | -0.0538 | 0.0498 | 0.2797 |
| rs7608910                                       | 0.0663  | 0.0526 | 0.2074 |
| rs762422                                        | -0.1105 | 0.0637 | 0.0830 |
| rs7724036                                       | -0.0501 | 0.0594 | 0.3992 |
| rs7749278                                       | 0.0873  | 0.0749 | 0.2433 |
| rs7788750                                       | 0.0356  | 0.1049 | 0.7345 |
| rs8005161                                       | 0.0828  | 0.0779 | 0.2883 |
| rs8107703                                       | -0.1603 | 0.1011 | 0.1129 |
| rs913678                                        | 0.0601  | 0.1110 | 0.5880 |
| rs921720                                        | -0.0804 | 0.0770 | 0.2964 |
| rs941823                                        | 0.0062  | 0.0957 | 0.9482 |
| rs9557195                                       | -0.0318 | 0.0804 | 0.6928 |
| All - IVW<br>(multiplicative<br>random effects) | -0.0028 | 0.0090 | 0.7527 |
| All - MR Egger                                  | -0.0002 | 0.0210 | 0.9913 |
| MR-PRESSO                                       | -0.0028 | 0.0090 | 0.7550 |

Abbreviation: MR, Mendelian Randomization; IVW, Inverse-Variance Weighted; SE, Standard Error; SNPs , Single Nucleotide Polymorphisms.

**Supplementary Table 2. Characteristics of the 81 SNPs related to atrial fibrillation and inflammatory bowel disease.**

| SNP        | Effects on inflammatory bowel disease |    |        |         |        |                           | Effects on atrial fibrillation |    |        |         |        |        |
|------------|---------------------------------------|----|--------|---------|--------|---------------------------|--------------------------------|----|--------|---------|--------|--------|
|            | EA                                    | OA | EAF    | Beta    | SE     | p-val                     | EA                             | OA | EAF    | Beta    | SE     | p-val  |
| rs1042058  | C                                     | T  | 0.5920 | 0.0710  | 0.0112 | 2.0900×10 <sup>-10</sup>  | C                              | T  | 0.5930 | -0.0055 | 0.0068 | 0.4176 |
| rs10521318 | T                                     | C  | 0.0846 | -0.1273 | 0.0210 | 1.4100×10 <sup>-9</sup>   | T                              | C  | 0.0982 | 0.0054  | 0.0114 | 0.6323 |
| rs1062158  | T                                     | C  | 0.6290 | 0.0807  | 0.0114 | 1.2100×10 <sup>-12</sup>  | T                              | C  | 0.6156 | -0.0139 | 0.0068 | 0.0420 |
| rs10758669 | A                                     | C  | 0.6510 | -0.1613 | 0.0115 | 7.8800×10 <sup>-45</sup>  | A                              | C  | 0.6473 | 0.0035  | 0.0076 | 0.6418 |
| rs10761659 | G                                     | A  | 0.5430 | 0.1565  | 0.0111 | 8.4700×10 <sup>-45</sup>  | G                              | A  | 0.5433 | -0.0019 | 0.0067 | 0.7766 |
| rs11209026 | A                                     | G  | 0.0670 | -0.7095 | 0.0263 | 8.1300×10 <sup>-161</sup> | A                              | G  | 0.0625 | 0.0042  | 0.0139 | 0.7626 |
| rs11230563 | T                                     | C  | 0.3460 | -0.0827 | 0.0116 | 9.0300×10 <sup>-13</sup>  | T                              | C  | 0.3456 | -0.0041 | 0.0070 | 0.5601 |
| rs11564126 | G                                     | A  | 0.0310 | 0.3418  | 0.0342 | 1.6700×10 <sup>-23</sup>  | G                              | A  | 0.0187 | 0.0089  | 0.0254 | 0.7269 |
| rs11597483 | G                                     | A  | 0.3460 | 0.1125  | 0.0114 | 5.2400×10 <sup>-23</sup>  | G                              | A  | 0.3382 | -0.0159 | 0.0070 | 0.0229 |
| rs11672983 | A                                     | G  | 0.3920 | 0.0677  | 0.0113 | 2.4800×10 <sup>-9</sup>   | A                              | G  | 0.3709 | 0.0033  | 0.0068 | 0.6211 |
| rs11742570 | C                                     | T  | 0.6050 | 0.1834  | 0.0113 | 3.4600×10 <sup>-59</sup>  | C                              | T  | 0.6020 | 0.0049  | 0.0068 | 0.4723 |
| rs11879191 | A                                     | G  | 0.2030 | -0.1212 | 0.0138 | 2.0400×10 <sup>-18</sup>  | A                              | G  | 0.1995 | -0.0066 | 0.0084 | 0.4275 |
| rs12142199 | A                                     | G  | 0.8110 | -0.0977 | 0.0150 | 7.5900×10 <sup>-11</sup>  | A                              | G  | 0.7787 | 0.0086  | 0.0086 | 0.3184 |
| rs1250550  | A                                     | C  | 0.3240 | -0.0966 | 0.0121 | 1.1900×10 <sup>-15</sup>  | A                              | C  | 0.3596 | 0.0154  | 0.0070 | 0.0281 |
| rs12722515 | A                                     | C  | 0.1510 | -0.0903 | 0.0155 | 5.8200×10 <sup>-9</sup>   | A                              | C  | 0.1860 | -0.0128 | 0.0087 | 0.1413 |
| rs1292053  | G                                     | A  | 0.4460 | 0.0698  | 0.0109 | 1.7700×10 <sup>-10</sup>  | G                              | A  | 0.4415 | -0.0192 | 0.0067 | 0.0039 |
| rs12942547 | G                                     | A  | 0.4200 | -0.1080 | 0.0112 | 5.5100×10 <sup>-22</sup>  | G                              | A  | 0.4374 | 0.0070  | 0.0068 | 0.3004 |
| rs13009506 | T                                     | G  | 0.5230 | 0.1363  | 0.0110 | 3.4700×10 <sup>-35</sup>  | T                              | G  | 0.5188 | 0.0073  | 0.0066 | 0.2688 |
| rs13019081 | C                                     | A  | 0.3750 | -0.0962 | 0.0113 | 3.0000×10 <sup>-17</sup>  | C                              | A  | 0.3864 | 0.0049  | 0.0068 | 0.4712 |
| rs1456896  | T                                     | C  | 0.6880 | 0.0889  | 0.0119 | 9.7500×10 <sup>-14</sup>  | T                              | C  | 0.6607 | -0.0033 | 0.0071 | 0.6444 |
| rs1516976  | C                                     | T  | 0.1340 | -0.0962 | 0.0166 | 5.7700×10 <sup>-9</sup>   | C                              | T  | 0.1345 | -0.0032 | 0.0098 | 0.7434 |
| rs1517352  | C                                     | A  | 0.6000 | 0.0749  | 0.0113 | 3.2800×10 <sup>-11</sup>  | C                              | A  | 0.6094 | -0.0029 | 0.0068 | 0.6695 |
| rs1558744  | A                                     | G  | 0.3990 | 0.1106  | 0.0112 | 2.6300×10 <sup>-23</sup>  | A                              | G  | 0.4146 | 0.0094  | 0.0068 | 0.1641 |
| rs1569723  | A                                     | C  | 0.7410 | -0.0811 | 0.0124 | 6.5500×10 <sup>-11</sup>  | A                              | C  | 0.7363 | -0.0134 | 0.0077 | 0.0822 |
| rs17085007 | C                                     | T  | 0.1830 | 0.1048  | 0.0144 | 3.7500×10 <sup>-13</sup>  | C                              | T  | 0.1761 | 0.0128  | 0.0087 | 0.1422 |
| rs17119    | A                                     | G  | 0.7860 | 0.0935  | 0.0141 | 3.0700×10 <sup>-11</sup>  | A                              | G  | 0.7892 | -0.0021 | 0.0085 | 0.8075 |
| rs17396847 | A                                     | G  | 0.3850 | -0.0877 | 0.0119 | 1.6900×10 <sup>-13</sup>  | A                              | G  | 0.3888 | 0.0099  | 0.0069 | 0.1523 |
| rs17694108 | A                                     | G  | 0.2820 | 0.1008  | 0.0129 | 5.8500×10 <sup>-15</sup>  | A                              | G  | 0.2952 | -0.0094 | 0.0077 | 0.2208 |
| rs17835641 | C                                     | G  | 0.5230 | -0.0683 | 0.0110 | 4.8800×10 <sup>-10</sup>  | C                              | G  | 0.5058 | -0.0085 | 0.0066 | 0.2024 |
| rs1847472  | A                                     | C  | 0.3450 | -0.0704 | 0.0116 | 1.1000×10 <sup>-9</sup>   | A                              | C  | 0.3485 | -0.0016 | 0.0070 | 0.8197 |
| rs1872691  | A                                     | G  | 0.1800 | -0.1258 | 0.0146 | 5.5900×10 <sup>-18</sup>  | A                              | G  | 0.1860 | -0.0060 | 0.0085 | 0.4801 |
| rs1991866  | C                                     | G  | 0.5780 | -0.0672 | 0.0112 | 1.6500×10 <sup>-9</sup>   | C                              | G  | 0.5768 | 0.0092  | 0.0068 | 0.1735 |
| rs2024092  | A                                     | G  | 0.2150 | 0.1089  | 0.0136 | 1.2300×10 <sup>-15</sup>  | A                              | G  | 0.2046 | -0.0001 | 0.0082 | 0.9923 |
| rs2155219  | T                                     | G  | 0.5090 | 0.1389  | 0.0111 | 4.2400×10 <sup>-36</sup>  | T                              | G  | 0.4977 | 0.0118  | 0.0067 | 0.0753 |
| rs2413583  | T                                     | C  | 0.1670 | -0.1818 | 0.0152 | 4.4000×10 <sup>-33</sup>  | T                              | C  | 0.1590 | 0.0238  | 0.0091 | 0.0090 |
| rs243323   | G                                     | A  | 0.3110 | -0.0935 | 0.0120 | 6.1200×10 <sup>-15</sup>  | G                              | A  | 0.2911 | -0.0127 | 0.0072 | 0.0800 |
| rs259964   | G                                     | A  | 0.5360 | -0.0788 | 0.0111 | 1.0100×10 <sup>-12</sup>  | G                              | A  | 0.5428 | -0.0037 | 0.0067 | 0.5775 |
| rs2816954  | A                                     | T  | 0.8490 | 0.0935  | 0.0167 | 2.4000×10 <sup>-8</sup>   | A                              | T  | 0.8248 | -0.0255 | 0.0091 | 0.0052 |
| rs2823286  | A                                     | G  | 0.2920 | -0.1410 | 0.0124 | 9.2800×10 <sup>-30</sup>  | A                              | G  | 0.2920 | 0.0050  | 0.0074 | 0.4999 |
| rs2836878  | A                                     | G  | 0.2670 | -0.1771 | 0.0129 | 7.2700×10 <sup>-43</sup>  | A                              | G  | 0.2795 | -0.0144 | 0.0075 | 0.0551 |
| rs2930047  | C                                     | T  | 0.3820 | 0.0650  | 0.0113 | 1.0300×10 <sup>-8</sup>   | C                              | T  | 0.3599 | -0.0071 | 0.0069 | 0.3006 |
| rs3091316  | A                                     | G  | 0.2780 | -0.1134 | 0.0124 | 5.2600×10 <sup>-20</sup>  | A                              | G  | 0.2947 | -0.0017 | 0.0073 | 0.8131 |

|           |   |   |        |         |        |                          |   |   |        |         |        |        |
|-----------|---|---|--------|---------|--------|--------------------------|---|---|--------|---------|--------|--------|
| rs3764147 | G | A | 0.2480 | 0.0923  | 0.0128 | 5.6300×10 <sup>-13</sup> | G | A | 0.2116 | 0.0016  | 0.0080 | 0.8410 |
| rs3851228 | T | A | 0.0730 | 0.1586  | 0.0213 | 1.0800×10 <sup>-13</sup> | T | A | 0.0646 | -0.0040 | 0.0136 | 0.7694 |
| rs4246905 | C | T | 0.7090 | 0.1483  | 0.0125 | 2.8000×10 <sup>-32</sup> | C | T | 0.7063 | 0.0132  | 0.0075 | 0.0771 |
| rs4380874 | C | T | 0.5950 | -0.0944 | 0.0113 | 7.1300×10 <sup>-17</sup> | C | T | 0.5863 | 0.0116  | 0.0069 | 0.0925 |
| rs4409764 | G | T | 0.5090 | -0.1714 | 0.0110 | 1.0300×10 <sup>-54</sup> | G | T | 0.5111 | 0.0029  | 0.0066 | 0.6653 |
| rs4626115 | T | C | 0.1380 | 0.1053  | 0.0155 | 1.1000×10 <sup>-11</sup> | T | C | 0.1471 | -0.0056 | 0.0094 | 0.5536 |
| rs4656958 | G | A | 0.6860 | 0.0691  | 0.0119 | 6.8000×10 <sup>-9</sup>  | G | A | 0.6692 | 0.0112  | 0.0071 | 0.1152 |
| rs4743820 | T | C | 0.7020 | 0.0705  | 0.0122 | 6.4500×10 <sup>-9</sup>  | T | C | 0.6987 | 0.0107  | 0.0073 | 0.1444 |
| rs4921227 | G | A | 0.3290 | 0.1476  | 0.0116 | 6.1900×10 <sup>-37</sup> | G | A | 0.3332 | -0.0033 | 0.0071 | 0.6473 |
| rs559928  | C | T | 0.8210 | 0.0949  | 0.0144 | 4.1900×10 <sup>-11</sup> | C | T | 0.7930 | 0.0163  | 0.0084 | 0.0528 |
| rs6017342 | C | A | 0.5300 | 0.1196  | 0.0125 | 1.4300×10 <sup>-21</sup> | C | A | 0.5194 | 0.0008  | 0.0070 | 0.9054 |
| rs6142618 | G | A | 0.5640 | 0.0682  | 0.0110 | 6.0500×10 <sup>-10</sup> | G | A | 0.5726 | -0.0016 | 0.0068 | 0.8142 |
| rs6426833 | A | G | 0.5420 | 0.1222  | 0.0110 | 2.0200×10 <sup>-28</sup> | A | G | 0.5181 | 0.0139  | 0.0066 | 0.0359 |
| rs6588248 | G | T | 0.5370 | 0.0827  | 0.0110 | 4.9800×10 <sup>-14</sup> | G | T | 0.5250 | -0.0028 | 0.0066 | 0.6768 |
| rs6592362 | G | A | 0.7520 | -0.0705 | 0.0126 | 2.3200×10 <sup>-8</sup>  | G | A | 0.7281 | 0.0022  | 0.0077 | 0.7697 |
| rs6724516 | A | G | 0.7200 | 0.0797  | 0.0126 | 2.2300×10 <sup>-10</sup> | A | G | 0.7400 | -0.0078 | 0.0078 | 0.3209 |
| rs6740462 | A | C | 0.7390 | 0.0705  | 0.0126 | 2.3500×10 <sup>-8</sup>  | A | C | 0.7245 | 0.0027  | 0.0076 | 0.7198 |
| rs683078  | C | T | 0.4830 | -0.0658 | 0.0110 | 2.4300×10 <sup>-9</sup>  | C | T | 0.4458 | 0.0006  | 0.0067 | 0.9300 |
| rs6879495 | T | C | 0.5310 | 0.0779  | 0.0111 | 2.4600×10 <sup>-12</sup> | T | C | 0.5172 | 0.0062  | 0.0066 | 0.3498 |
| rs6911490 | C | T | 0.7920 | -0.1196 | 0.0138 | 3.8000×10 <sup>-18</sup> | C | T | 0.7696 | 0.0041  | 0.0082 | 0.6222 |
| rs6920220 | A | G | 0.2060 | 0.1035  | 0.0134 | 1.0100×10 <sup>-14</sup> | A | G | 0.2107 | 0.0110  | 0.0082 | 0.1770 |
| rs7097656 | C | T | 0.8020 | 0.1059  | 0.0139 | 2.0500×10 <sup>-14</sup> | C | T | 0.7826 | -0.0178 | 0.0083 | 0.0329 |
| rs7200798 | A | G | 0.5270 | 0.0630  | 0.0110 | 1.2700×10 <sup>-8</sup>  | A | G | 0.5493 | 0.0041  | 0.0067 | 0.5448 |
| rs7214193 | G | A | 0.2230 | -0.0742 | 0.0132 | 1.6000×10 <sup>-8</sup>  | G | A | 0.2062 | -0.0181 | 0.0082 | 0.0277 |
| rs7240004 | G | A | 0.3840 | -0.0667 | 0.0116 | 9.8100×10 <sup>-9</sup>  | G | A | 0.3794 | 0.0011  | 0.0069 | 0.8758 |
| rs727088  | A | G | 0.5160 | -0.0654 | 0.0112 | 4.6500×10 <sup>-9</sup>  | A | G | 0.5122 | 0.0035  | 0.0067 | 0.6051 |
| rs7495132 | T | C | 0.1090 | -0.1196 | 0.0185 | 9.4800×10 <sup>-11</sup> | T | C | 0.1125 | 0.0056  | 0.0106 | 0.5987 |
| rs7554511 | A | C | 0.2750 | -0.1487 | 0.0125 | 1.2400×10 <sup>-32</sup> | A | C | 0.2957 | 0.0080  | 0.0074 | 0.2757 |
| rs7608910 | G | A | 0.3940 | 0.1312  | 0.0112 | 8.6500×10 <sup>-32</sup> | G | A | 0.3655 | 0.0087  | 0.0069 | 0.2064 |
| rs762422  | A | G | 0.6160 | -0.1177 | 0.0112 | 6.5200×10 <sup>-26</sup> | A | G | 0.6072 | 0.0130  | 0.0075 | 0.0818 |
| rs7724036 | T | C | 0.0944 | 0.2038  | 0.0190 | 1.0300×10 <sup>-26</sup> | T | C | 0.0786 | -0.0102 | 0.0121 | 0.3971 |
| rs7749278 | C | T | 0.4680 | 0.0882  | 0.0110 | 8.4500×10 <sup>-16</sup> | C | T | 0.4791 | 0.0077  | 0.0066 | 0.2439 |
| rs7788750 | T | C | 0.0459 | 0.1630  | 0.0261 | 4.4400×10 <sup>-10</sup> | T | C | 0.0397 | 0.0058  | 0.0171 | 0.7342 |
| rs8005161 | T | C | 0.0887 | 0.1450  | 0.0190 | 2.3500×10 <sup>-14</sup> | T | C | 0.0907 | 0.0120  | 0.0113 | 0.2894 |
| rs8107703 | A | G | 0.9460 | -0.1622 | 0.0252 | 1.1900×10 <sup>-10</sup> | A | G | 0.9233 | 0.0260  | 0.0164 | 0.1135 |
| rs913678  | C | T | 0.3380 | -0.0649 | 0.0118 | 4.5900×10 <sup>-8</sup>  | C | T | 0.3322 | -0.0039 | 0.0072 | 0.5932 |
| rs921720  | G | A | 0.6090 | 0.0883  | 0.0113 | 6.7100×10 <sup>-15</sup> | G | A | 0.6170 | -0.0071 | 0.0068 | 0.2985 |
| rs941823  | C | T | 0.7580 | 0.0805  | 0.0128 | 3.8400×10 <sup>-10</sup> | C | T | 0.7326 | 0.0005  | 0.0077 | 0.9530 |
| rs9557195 | C | T | 0.2280 | -0.1008 | 0.0133 | 2.3700×10 <sup>-14</sup> | C | T | 0.2095 | 0.0032  | 0.0081 | 0.6936 |

Abbreviation: EA, Effect Allele; OA, Other Allele; EAF, effect allele frequency; SE, standard error; SNP, single nucleotide polymorphism.
